# Supplementary material for: Determination of 25 polybrominated diphenyl ethers in Chinese mitten crab ecosystems by gas chromatography-mass spectrometry
Source: Royal Society of Chemistry journal article supplement (doi:10.1039/d3ay01123b), 2023-01-01
Supplement: d3ay01123b1.pdf [file d3ay01123b1.pdf]

Table S1 The concentrations and total concentrations of PBDE congeners in ten samples from two Chinese mitten crab farms

| Target Analyte | Farm.1            |                       |                   |                   |                 | Farm.2            |                       |                   |                   |                 |
|----------------|-------------------|-----------------------|-------------------|-------------------|-----------------|-------------------|-----------------------|-------------------|-------------------|-----------------|
|                | Crab<br>(pg/g ww) | Sediment<br>(pg/g dw) | Feed<br>(pg/g dw) | Corn<br>(pg/g dw) | Water<br>(pg/L) | Crab<br>(pg/g ww) | Sediment<br>(pg/g dw) | Feed<br>(pg/g dw) | Corn<br>(pg/g dw) | Water<br>(pg/L) |
| BDE-15         | 1.3               | 0.2                   | n.d.              | n.d.              | n.d.            | 2.9               | n.d.                  | 0.4               | n.d.              | n.d.            |
| BDE-28         | 18.0              | 0.8                   | 4.1               | n.d.              | n.d.            | 4.5               | n.d.                  | 2.6               | n.d.              | n.d.            |
| BDE-47         | 86.5              | 0.7                   | 21.2              | n.d.              | n.d.            | 65.2              | n.d.                  | 23.3              | n.d.              | n.d.            |
| BDE-49         | 27.6              | 1.4                   | 15.9              | n.d.              | n.d.            | 18.8              | n.d.                  | 14.3              | n.d.              | n.d.            |
| BDE-99         | 9.3               | 0.6                   | 14.6              | n.d.              | n.d.            | 19.2              | n.d.                  | 0.4               | n.d.              | n.d.            |
| BDE-100        | 10.1              | n.d.                  | 26.4              | n.d.              | n.d.            | 6.8               | n.d.                  | 18.4              | n.d.              | n.d.            |
| BDE-153        | 38.0              | 1.2                   | 4.8               | n.d.              | n.d.            | 24.8              | n.d.                  | 4.0               | n.d.              | n.d.            |
| BDE-154        | 19.7              | n.d.                  | 18.9              | n.d.              | n.d.            | 6.0               | n.d.                  | 18.5              | n.d.              | n.d.            |
| BDE-183        | 20.2              | 2.9                   | 9.5               | n.d.              | n.d.            | 1.2               | n.d.                  | 3.1               | n.d.              | n.d.            |
| BDE-209        | 35.4              | n.d.                  | 20.1              | n.d.              | n.d.            | 46.1              | n.d.                  | 21.3              | n.d.              | n.d.            |
| ΣPBDEs         | 266.1             | 7.9                   | 135.5             | n.d.              | n.d.            | □ 195.5           | n.d.                  | 106.2             | n.d.              | n.d.            |

n.d: not detected
